# Supplementary material for: TRPM2 Oxidation Activates Two Distinct Potassium Channels in Melanoma Cells through Intracellular Calcium Increase
Source: MDPI journal article supplement (doi:10.3390/ijms22168359), 2021-08-04
Supplement: s1 [file s1]

# TRPM2 oxidation activates two distinct potassium channels in melanoma cells through intracellular calcium increase

**Table S1.** List of oligonucleotide primers used in real time qPCR. The primers were designed as indicated in the methods section.

| Table S1. Primers used in real time qPCR |                              |                           |
|------------------------------------------|------------------------------|---------------------------|
| <i>Gene</i>                              | <i>Forward</i>               | <i>Reverse</i>            |
| <i>KCNK1</i>                             | GCTCTTCTTCGCCAGCAC           | CTGACAAGGGCAGGGTGT        |
| <i>KCNK2</i>                             | TGCCAAAGTGGAAGATAC<br>GTT    | CAGGCAGAGCCACAAAG<br>AG   |
| <i>KCNK3</i>                             | CCTTCTACTTCGCCATCAC<br>C     | GAACATGCAGAACACCTT<br>GC  |
| <i>KCNK4</i>                             | TGGGCTTTGGCGACTATG           | AGCACTGAGGCGAAGTA<br>AGC  |
| <i>KCNK5</i>                             | GAGGGCCTCTACTACTCCT<br>TCAT  | GTACAGGGCGTGGTAGTT<br>GG  |
| <i>KCNK6</i>                             | GTCGCACCAGCAACTCTCT          | AGCTACCTGGGGATGGA<br>AG   |
| <i>KCNK7</i>                             | CCTGGGACCTTCCCTCAG           | CGATAGTGGGGCCATGTG        |
| <i>KCNK9</i>                             | TCCTTCTACTTTGCGATCAC<br>G    | ACGGCGTAGAACATGCA<br>GA   |
| <i>KCNK10</i>                            | AGTCCAATAGGAAACTCTT<br>CCAAC | CGGAGCAATATTCCCATA<br>CC  |
| <i>KCNK12</i>                            | GCATTACTCGCTCTTCAA<br>CG     | GCAGCATCCAGTTGAGCA<br>C   |
| <i>KCNK13</i>                            | GGCGCCTTCTACTTCGTG           | TACTGTCGCCGGAGTTGT<br>C   |
| <i>KCNK15</i>                            | TAGAATGACGGGGTTCATC<br>C     | GAAAGTCCTGCCAGAGAT<br>GC  |
| <i>KCNK16</i>                            | AGGCACAGTCGTCCTACC<br>A      | CCAACAGGGCATAGAAG<br>ACAC |
| <i>KCNK17</i>                            | CAGCAACACCACCAGCAT           | GCTCAGGTTGCCATAGCC        |
| <i>KCNK18</i>                            | GCAGCAGATGATGGAGAG<br>TTT    | CCTGTTTTCTGTCTTCCAC<br>CA |
| <i>KCNN4</i>                             | GCTGCGTCTCTACCTGGTG          | CGATGCTGCGGTAGGAAG        |
| <i>TRPM2</i>                             | CGAGCTGGAGAGAGGACT<br>GT     | AGGGCTCCATTCTGAGAC<br>C   |
| <i>ACTB</i>                              | CTGGAACGGTGAAGGTGA<br>CA     | AAGGGACTTCCTGTAACA<br>AT  |

**Table S2.** Differentially expressed genes between IGR39 and IGR37 cell lines. Data from GEO dataset GSE137391 were aligned to human genome as described in main text. EdgeR was used to obtain fold-change in expression, p-values and Benjamini-Hochberg adjusted p-value. We reported genes with more than 5 counts in at least one sample. Using a threshold adj.p-value < 0.05, KCNMA1, KCNN4 and TRPC4 result significantly upregulated in IGR39 cells compared to IGR37 while TRPM1, TRPM8, KCNK13 are downregulated in the same cells.

**Table S2. Differentially expressed genes in dataset GSE137391**

| Gene   | Ratio IGR39/IGR37 | P-value | Adjusted P-Value |
|--------|-------------------|---------|------------------|
| KCNMA1 | 256.47            | 3E-5    | 0.02             |
| TRPM1  | 0.02              | 8E-5    | 0.02             |
| TRPM8  | 5E-3              | 5E-4    | 0.02             |
| KCNN4  | 19.31             | 8E-4    | 0.03             |
| KCNK13 | 8E-3              | 1E-3    | 0.03             |
| TRPC4  | 101.45            | 2E-3    | 0.04             |
| KCNK5  | 0.01              | 3E-3    | 0.05             |
| TRPM2  | 8.11              | 0.01    | 0.10             |
| MCOLN2 | 0.29              | 0.02    | 0.14             |
| KCNN3  | 35.13             | 0.02    | 0.14             |
| KCNN2  | 0.09              | 0.03    | 0.20             |
| KCNK6  | 3.85              | 0.04    | 0.21             |
| TRPM7  | 0.52              | 0.06    | 0.28             |
| MCOLN3 | 0.40              | 0.08    | 0.34             |
| TRPV1  | 5.36              | 0.09    | 0.36             |
| KCNK2  | 2.66              | 0.11    | 0.40             |
| TRPC1  | 1.94              | 0.19    | 0.53             |
| TRPM4  | 1.82              | 0.26    | 0.62             |
| TRPV2  | 0.83              | 0.38    | 0.73             |
| MCOLN1 | 0.72              | 0.48    | 0.79             |
| KCNK15 | 0.68              | 0.59    | 0.85             |
| TRPM3  | 0.82              | 0.79    | 0.94             |
| KCNN1  | 0.95              | 0.93    | 0.98             |

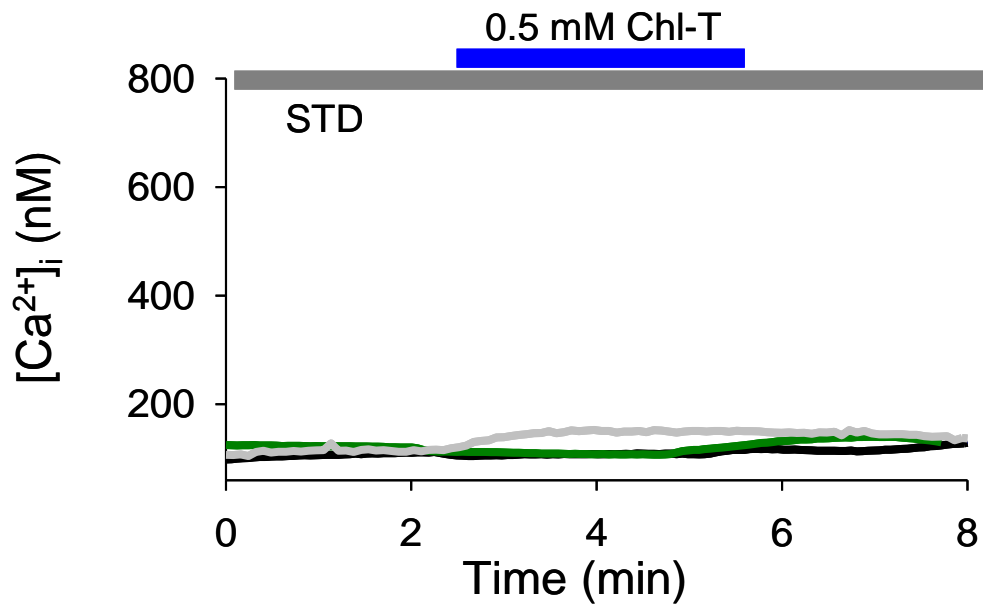

**Figure S1.** In IGR37, application of Chl-T does not increase intracellular  $Ca^{2+}$  concentration. Representative recordings of  $[Ca^{2+}]_i$  in different IGR37 cells obtained from different cells preparations after the application of 0.5 mM Chl-T in the standard bath solution containing 2 mM  $Ca^{2+}$

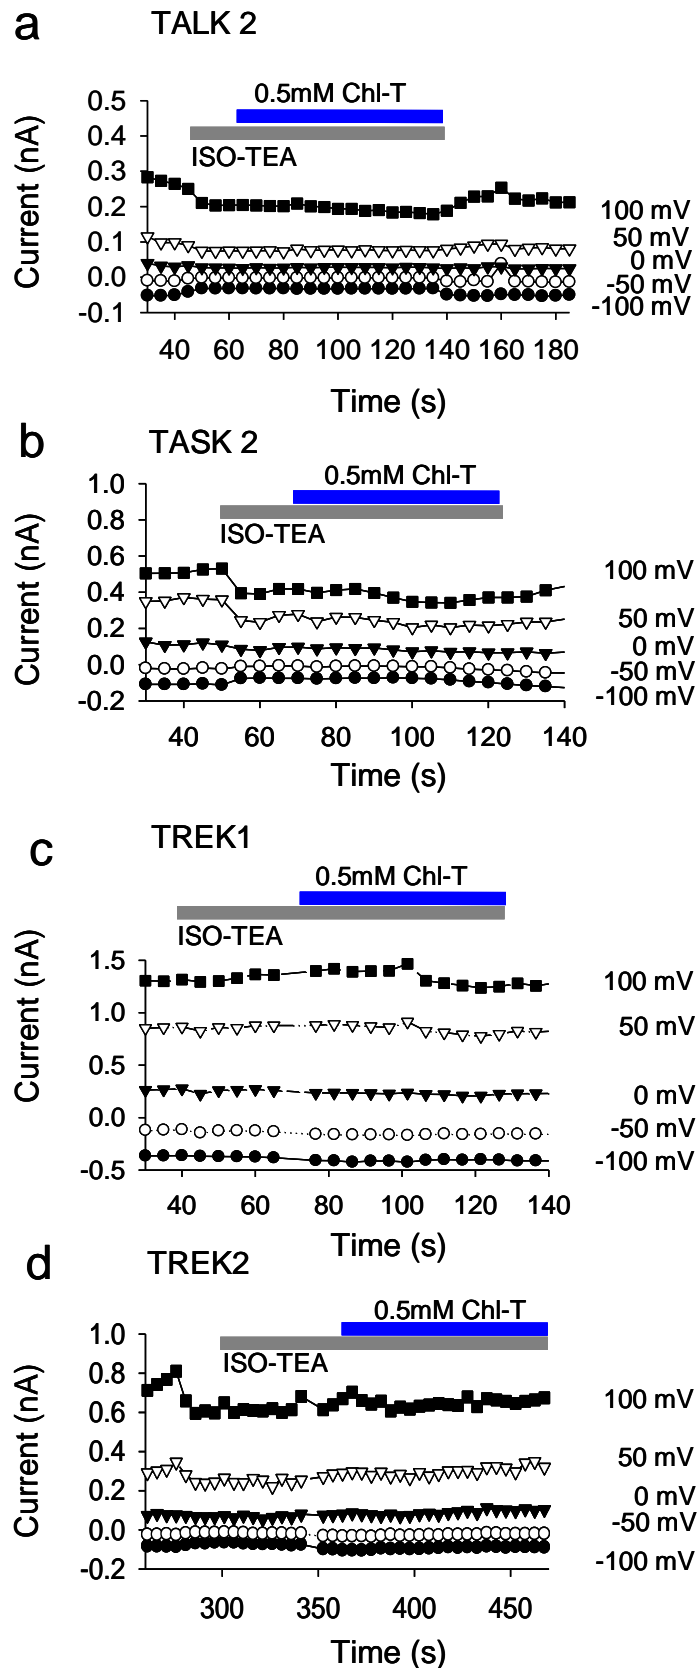

**Figure S2.** Candidate potassium channels. K2P channels, namely TALK2 (KCNK17) (a), TASK2 (KCNK5) (b), TREK1 (KCNK2) (c) and TREK2 (KCNK10) (d) were separately transfected in HEK 293 cells and tested for their sensitivity to Chl-T oxidation. None of them showed any response. The HEK-293 cell line was cultured in DMEM medium, supplemented with 10% fetal calf serum, 2 mM L-glutamine, 100 U/ml penicillin, 100  $\mu$ g/ml streptomycin. Cells were maintained at 37  $^{\circ}$ C in a 5% CO<sub>2</sub> / 95% air atmosphere. Cells

were transfected by means of the Effectene Kit from Qiagen, using 400 ng of each plasmid expressing different K2P channels and 50 ng of a vector expressing CD8. Currents were recorded 24–48 h after transfection incubating cells at 37°C.

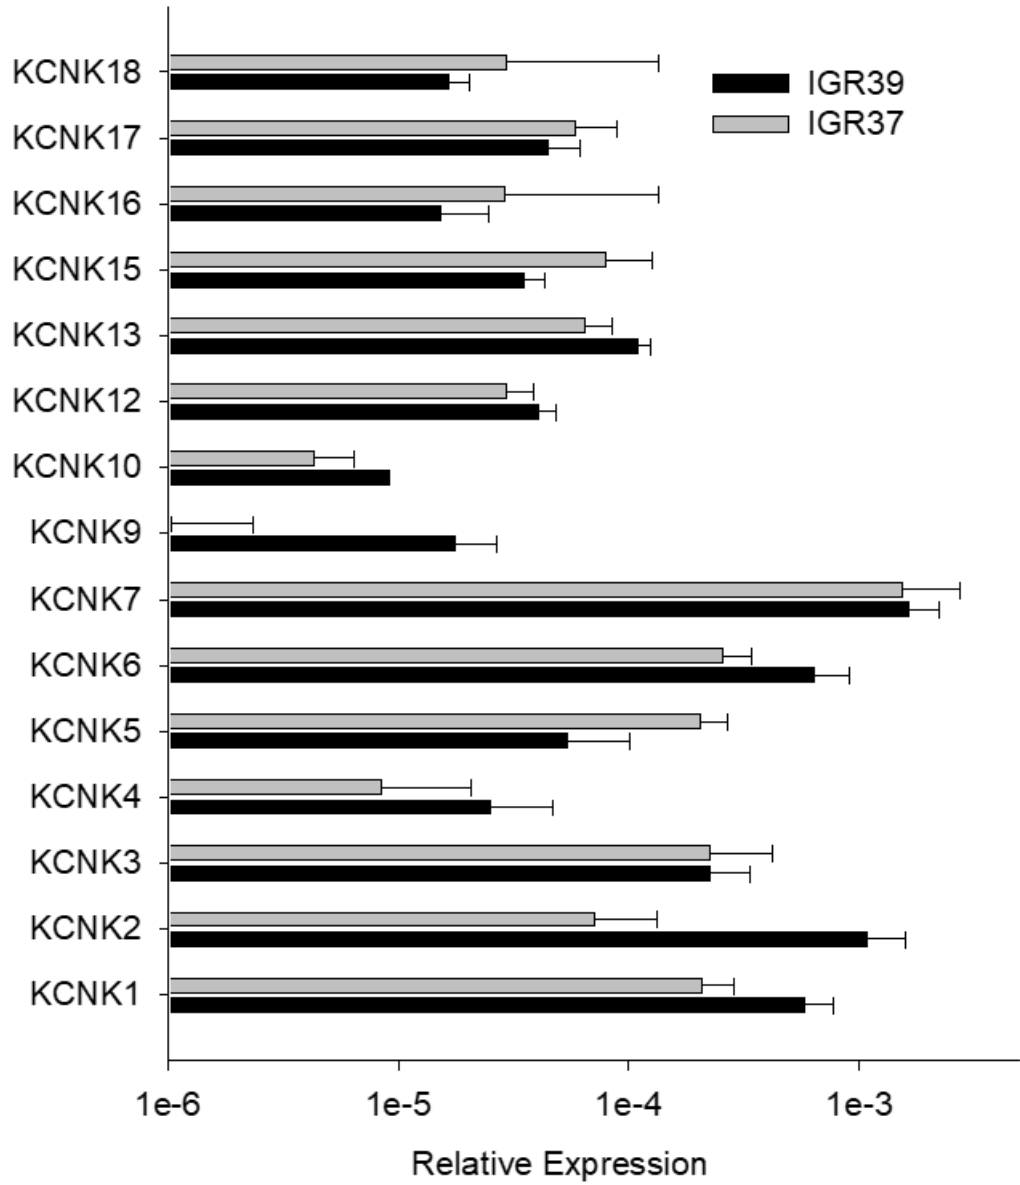

**Figure S3.** Expression profile of K2P channels. Expression is relative to that of the house-keeping genes Actin or GAPDH (n=2-3 experiments, each one run in triplicate; see Methods).

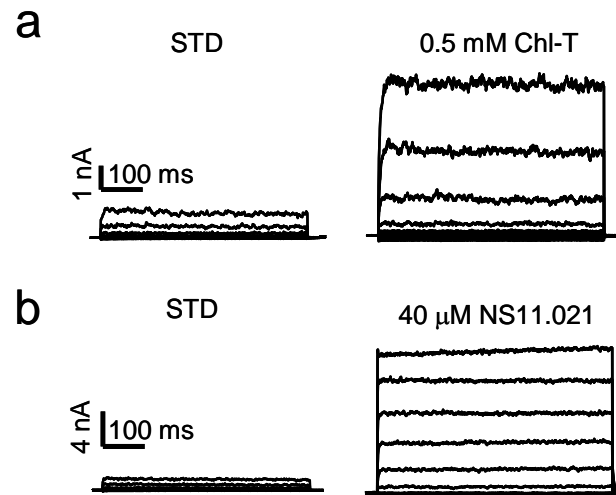

**Figure S4.** Activation of Potassium currents in Panc-1 cell line. a. Activation of large potassium current by 0.5 mM Chl-T. b. BK currents evoked by the specific BK activator NS11021 (40 μM)
